# Supplementary material for: The Genetic Basis of Obesity and Related Metabolic Diseases in Humans and Companion Animals
Source: Genes (Basel). 2020 Nov 20;11(11):1378. doi: 10.3390/genes11111378 (PMC7699880; doi:10.3390/genes11111378)
Supplement: Supplementary file 1 [file genes-11-01378-s001.pdf]

**Table S1 - Candidate genes and gene variants for obesity and related metabolic disease in companion animals.** Gene variants used to test for association with obesity/obesity-related traits in candidate gene studies in companion animal species. N/A = not available, - = not applicable. *POMC*, proopiomelanocortin gene; *FTO*, FTO alpha-ketoglutarate dependent dioxygenase gene; *INSIG2*, Insulin induced gene 2; *FFAR4*, Free fatty acid receptor 4 gene; *GPR120*, G-protein coupled receptor 120 gene; *MC4R*, Melanocortin 4 receptor gene; *MC3R*, Melanocortin 3 receptor gene; *PPARG*, Peroxisome proliferator activated receptor gamma gene; *TNF*, Tumor necrosis factor gene; *IL6*, Interleukin 6; *RETN*, Resistin gene; *FAM174A*, Family with sequence similarity 174 member A gene; BCS, body condition score.

| Gene        | Species: Breed(s)                                                   | Genome build used | Variant(s) referenced in original paper                         | Alternative variant name used in current review (realigned to CanFam 3.1 where applicable) | Variant consequence     | Trait/association tested                                               | Reference               |
|-------------|---------------------------------------------------------------------|-------------------|-----------------------------------------------------------------|--------------------------------------------------------------------------------------------|-------------------------|------------------------------------------------------------------------|-------------------------|
| <i>POMC</i> | <i>Canis familiaris</i> : Labrador retriever, flat-coated retriever | CanFam 3.1        | 17:19431664, G>T, S239I                                         | c.716C>A, p.Ser239Ile, rs852254866                                                         | Nonsynonymous, missense | No significant association found with BCS                              | Raffan et al., 2016 [1] |
|             |                                                                     |                   | 17:19431807, GCGCCGGCCCGGGA> - , P187fs, (17:19431807-19431821) | c.560_573del AGGGCCCCGCCGCG, p.Q186fs, (17:19431807-19431821)                              | Frameshift, deletion    | Significant association found with body weight, adiposity and appetite |                         |
|             |                                                                     |                   | 17:19431813, C>G                                                | c.567G>C, p.Pro189Pro, rs851551584                                                         | Synonymous coding       | No significant association found with BCS                              |                         |
|             |                                                                     |                   | 17:19431820, A>AG, P187PE                                       | c.559_560insG, p.Gln187Argfs, rs852143109                                                  | Frameshift, insertion   |                                                                        |                         |
|             |                                                                     |                   | 17:19431850, C>G, R178G                                         | c.532C>G, p.Arg178Gly, rs852665700                                                         | Nonsynonymous, missense |                                                                        |                         |
|             |                                                                     |                   | 17:19431861, A>G, K174R                                         | c.521A>G, p.Lys174Arg, rs851770148                                                         | Nonsynonymous, missense |                                                                        |                         |
|             |                                                                     |                   | 17:19431983, C>G                                                | c.399C>T, p.Arg133Arg                                                                      | Synonymous coding       |                                                                        |                         |
|             |                                                                     |                   | 17:19432208, G>A                                                | c.174G>A, p.Thr58Thr                                                                       | Synonymous coding       |                                                                        |                         |
|             |                                                                     |                   | 17:19432226, C>A                                                | c.156C>A, p.Pro52Pro, rs851959389                                                          | Synonymous coding       |                                                                        |                         |

|      |                                               |                                                                          |                                   |                                       |                             |                                                                           |                                     |
|------|-----------------------------------------------|--------------------------------------------------------------------------|-----------------------------------|---------------------------------------|-----------------------------|---------------------------------------------------------------------------|-------------------------------------|
|      |                                               |                                                                          | 17:19432391,<br>GGGCGAGCTCCTG > - | N/A                                   | Intronic deletion           |                                                                           |                                     |
|      |                                               |                                                                          | 17:19432427, C>G                  | -                                     | Intronic                    |                                                                           |                                     |
|      |                                               |                                                                          | 17:19432428, A>C                  | -                                     | Intronic                    |                                                                           |                                     |
|      |                                               |                                                                          | 17:19434068, T>C                  | -                                     | Intronic                    |                                                                           |                                     |
| MC4R | <i>Canis familiaris</i> :<br>various          | CHORI-82:<br>Canine<br>Boxer (F)<br>(C.<br>familiaris)<br>BAC<br>Library | G637T                             | c.637G>T, p.Val213Phe,<br>rs852614811 | Non-synonymous,<br>missense | No association test<br>conducted in dogs                                  | Skorczyk et<br>al., 2007 [2]        |
|      |                                               |                                                                          | T777C                             | c.777T>C, p.Ala259Ala,<br>rs851987283 | Synonymous<br>coding        |                                                                           |                                     |
|      |                                               |                                                                          | (+33)G                            | c.*33C>G, rs851539399                 | 3'UTR                       |                                                                           |                                     |
|      | <i>Canis familiaris</i> ;<br>golden retriever | N/A                                                                      | c.637G>T                          | c.637G>T, p.Val213Phe,<br>rs852614811 | Non-synonymous,<br>missense | No significant<br>association found<br>with morphological<br>measurements | van den<br>Berg et al.,<br>2010 [3] |
|      |                                               |                                                                          | c.777T>C                          | c.777T>C, p.Ala259Ala,<br>rs851987283 | Synonymous<br>coding        | No significant<br>association found<br>with morphological<br>measurements |                                     |
|      |                                               |                                                                          | c.*33C>G                          | c.*33C>G, rs851539399                 | 3'UTR                       | No association test<br>conducted                                          |                                     |
|      |                                               |                                                                          | c.868C>T                          | c.868C>T, p.Leu290Leu,<br>rs851062983 | Synonymous<br>coding        | No significant<br>association found<br>with morphological<br>measurements |                                     |
|      | <i>Canis familiaris</i> ;<br>beagle           | CHORI-82:<br>Canine<br>Boxer (F)<br>(C.<br>familiaris)<br>BAC<br>Library | C895T                             | c.777T>C, p.Ala259Ala,<br>rs851987283 | Synonymous<br>coding        | Significant<br>association found<br>with body weight in<br>females        | Zeng et al.,<br>2014 [4]            |
|      |                                               |                                                                          | A420C                             | c.302C>A, p.Thr101Asn                 | Non-synonymous,<br>missense | Significant<br>association found<br>with body weight                      |                                     |
|      | <i>Canis familiaris</i> ;<br>Labrador         | CanFam<br>3.1                                                            | 1:16132817, G>T, S330I            | c.989G>T, p.Ser330Ile                 | Non-synonymous,<br>missense | No significant<br>association found<br>with BCS                           | Raffan et al.,<br>2016 [1]          |

|                                                                                        |            |                                                             |                                    |                          |                                                                         |                           |
|----------------------------------------------------------------------------------------|------------|-------------------------------------------------------------|------------------------------------|--------------------------|-------------------------------------------------------------------------|---------------------------|
| retriever, flat coated retriever                                                       |            | 1:16133054, C>T                                             | c.*227C>T                          | 3'UTR                    |                                                                         |                           |
|                                                                                        |            | 1:16132465, G>T, V213F                                      | c.637G>T, p.Val213Phe, rs852614811 | Non-synonymous, missense |                                                                         |                           |
|                                                                                        |            | 1:16132860, C>G                                             | c.*33C>G, rs851539399              | 3'UTR                    |                                                                         |                           |
|                                                                                        |            | 1:16132605, T>C                                             | c.777T>C, p.Ala259Ala, rs851987283 | Synonymous coding        |                                                                         |                           |
| <i>Canis familiaris</i> ; Labrador retriever, golden retriever, beagle, cocker spaniel | CanFam 3.1 | c.637G>T, p.Val213Phe, rs852614811                          | c.637G>T, p.Val213Phe, rs852614811 | Non-synonymous, missense | Significant association found with BCS in beagles <i>only</i>           | Mankowska et al, 2017 [5] |
|                                                                                        |            | c.777T>C, rs851987283                                       | c.777T>C, p.Ala259Ala, rs851987283 | Synonymous coding        | Significant association found with BCS in golden retrievers <i>only</i> |                           |
|                                                                                        |            | c.868C>T, rs851062983                                       | c.868C>T, p.Leu290Leu, rs851062983 | Synonymous coding        | Significant association found with BCS in golden retrievers <i>only</i> |                           |
|                                                                                        |            | c.*33C>G, rs851539399                                       | c.*33C>G, rs851539399              | 3'UTR                    | Significant association found with BCS in golden retrievers <i>only</i> |                           |
|                                                                                        |            | c.*227C>T                                                   | c.*227C>T                          | 3'UTR                    | No significant association found with BCS in any breed                  |                           |
|                                                                                        |            | c.-435T>C, rs852471376                                      | c.-435T>C, rs852471376             | 5' flanking              | Significant association found with BCS in beagles <i>only</i>           |                           |
|                                                                                        |            | c.301A>C<br>**not found in genotyped cohort but referred to | c.302C>A, p.Thr101Asn              | Non-synonymous, missense | No association test conducted                                           |                           |

|              |                                                           |                                                                          |                               |                                       |                                 |                                                                                                 |                              |
|--------------|-----------------------------------------------------------|--------------------------------------------------------------------------|-------------------------------|---------------------------------------|---------------------------------|-------------------------------------------------------------------------------------------------|------------------------------|
|              | <i>Felis catus</i> ;<br>domestic short<br>haired, Burmese | Felis_catus-<br>6.2                                                      | c.92 C>T                      | c.92 C>T, p.Leu31Pro,<br>rs783632116  | Non-<br>synonymous,<br>missense | Significant<br>association found<br>with obese diabetics<br>vs nondiabetics in<br>DSH cats only | Forcada et<br>al, 2014 [6]   |
|              |                                                           |                                                                          | c.297C>T                      | c.297C>T, p.Ser99Ser                  | Synonymous<br>coding            | No association test<br>conducted                                                                |                              |
|              |                                                           |                                                                          | c.303C>T                      | c.303C>T, p.Thr101Thr,<br>rs785927510 | Synonymous<br>coding            | No association test<br>conducted                                                                |                              |
| FTO          | <i>Canis familiaris</i> ;<br>various                      | CHORI-82:<br>Canine<br>Boxer (F)<br>(C.<br>familiaris)<br>BAC<br>Library | 23 C/T, Thr1Met               | c.23C>T, p.Thr8Met,<br>rs852870212    | Non-<br>synonymous,<br>missense | No association test<br>conducted in dogs                                                        | Grzes et al.,<br>2011 [7]    |
|              |                                                           |                                                                          | I1; 192 A/T                   | -                                     | Intronic                        |                                                                                                 |                              |
|              |                                                           |                                                                          | I1; 223 T/C                   | -                                     | Intronic                        |                                                                                                 |                              |
|              |                                                           |                                                                          | 378053 G/A                    | -                                     | 3' flanking                     |                                                                                                 |                              |
|              |                                                           |                                                                          | 378284 T/C                    | -                                     | 3' flanking                     |                                                                                                 |                              |
|              |                                                           |                                                                          | 378318 G/C                    | -                                     | 3' flanking                     |                                                                                                 |                              |
| MC3R         | <i>Canis familiaris</i> ;<br>various                      | CHORI-82:<br>Canine<br>Boxer (F)<br>(C.<br>familiaris)<br>BAC<br>Library | c.-90T(11_13); 5'<br>flanking | c.-90delT, rs853092001                | 5'UTR, deletion                 | No association test<br>conducted in dogs                                                        | Skorczyk et<br>al., 2011 [8] |
|              |                                                           |                                                                          | c.142C>T                      | c.142C>T, p.Leu48Leu,<br>rs8916554    | Synonymous<br>coding            |                                                                                                 |                              |
| INSIG2       | <i>Canis familiaris</i> ;<br>various                      | CHORI-82:<br>Canine<br>Boxer (F)<br>(C.<br>familiaris)<br>BAC<br>Library | -91 G/A; 5' flanking          | c.-90G>A, rs852813691                 | 5' UTR                          | No association test<br>conducted in dogs                                                        | Grzes et al.,<br>2011 [7]    |
|              |                                                           |                                                                          | c.-1C>T; 5' flanking          | c.-1C>T                               | 5' UTR                          |                                                                                                 |                              |
|              |                                                           |                                                                          | 40 C/A; Arg>Ser               | c.40C>A, p.Arg14Ser,<br>rs850773724   | Non-<br>synonymous,<br>missense |                                                                                                 |                              |
|              |                                                           |                                                                          | I1; 1483 A/T                  | -                                     | Intronic                        |                                                                                                 |                              |
|              |                                                           |                                                                          | I1; 1637 C/T                  | -                                     | Intronic                        |                                                                                                 |                              |
|              |                                                           |                                                                          | I1; 2169 G/A                  | -                                     | Intronic                        |                                                                                                 |                              |
| GPR120/FFAR4 | <i>Canis familiaris</i> ;<br>various                      | CanFam<br>3.1                                                            | c.252C>G, p.Ala84Ala          | c.252C>G, p.Ala84Ala,<br>rs852631320  | Synonymous<br>coding            | No association test<br>conducted                                                                | Miyabe et<br>al., 2015 [9]   |
|              |                                                           |                                                                          | c.282C>G, p.Asp94Asp          | c.282C>G, p.Pro94Pro,<br>rs851850900  | Synonymous<br>coding            | No association test<br>conducted                                                                |                              |

|       |                                         |            |                       |                                    |                          |                                                                                      |                             |
|-------|-----------------------------------------|------------|-----------------------|------------------------------------|--------------------------|--------------------------------------------------------------------------------------|-----------------------------|
|       |                                         |            | c.702A>G, p.Thr234Thr | c.702A>G, p.Thr234Thr              | Synonymous coding        | No association test conducted                                                        |                             |
|       |                                         |            | c.726G>A, p.Thr242Thr | c.726G>A, p.Thr242Thr              | Synonymous coding        | No association test conducted                                                        |                             |
|       |                                         |            | c.984T>C, p.Asn328Asn | c.984T>C, p.Asn328Asn, rs852472019 | Synonymous coding        | No association test conducted                                                        |                             |
|       |                                         |            | c.287T>G, p.Leu96Arg  | c.287T>G, p.Leu96Arg               | Non-synonymous, missense | No association test conducted                                                        |                             |
|       |                                         |            | c.307G>A, p.Ala103Thr | c.307G>A, p.Ala103Thr              | Non-synonymous, missense | No association test conducted                                                        |                             |
|       |                                         |            | c.446G>C, p.Gly149Ala | c.446G>C, p.Gly149Ala              | Non-synonymous, missense | No association test conducted                                                        |                             |
|       |                                         |            | c.595C>A, p.Pro199Thr | c.595A>C, p.Thr199Pro, rs853030954 | Non-synonymous, missense | Significant association found with body condition                                    |                             |
| PPARG | Canis familiaris; various inc, mongrels | CanFam 2.0 | E7, C1362T            | N/A                                | N/A                      | No association test conducted                                                        | Nishii et al., 2007 [10]    |
| TNF   | Canis familiaris; various inc. mongrels | N/A        | c.-40A>C              | c.-40A>C, rs22216187               | 5' UTR                   | Significant association found with body condition in Labrador retrievers <i>only</i> | Mankowska et al., 2016 [11] |
|       |                                         |            | c.249C>T              | c.249C>T, p.Thr83Thr, rs9095590    | Synonymous coding        | No association test conducted                                                        |                             |
|       |                                         |            | c.548A>T, p.Glu183Val | c.548A>T, p.Glu183Val, rs851883595 | Non-synonymous, missense | No association test conducted                                                        |                             |
|       |                                         |            | c.627C>T              | c.627C>T, p.Ser209Ser, rs850991197 | Synonymous coding        | No association test conducted                                                        |                             |
|       |                                         |            | c.186+16A>G           | -                                  | Intronic                 | No association test conducted                                                        |                             |
|       |                                         |            | c.186 +174GAAT(5_7)   | -                                  | Intronic, insertion      | No association test conducted                                                        |                             |

|      |                                         |     |                             |                                   |                          |                                                                                      |
|------|-----------------------------------------|-----|-----------------------------|-----------------------------------|--------------------------|--------------------------------------------------------------------------------------|
|      |                                         |     | c.186+211C>T                | -                                 | Intronic                 | No association test conducted                                                        |
|      |                                         |     | c.187-47T>C                 | -                                 | Intronic                 | No association test conducted                                                        |
|      |                                         |     | c.233-54T>C                 | -                                 | Intronic                 | No association test conducted                                                        |
|      |                                         |     | c.233+14G>A                 | -                                 | Intronic                 | Significant association found with body condition in Labrador retrievers <i>only</i> |
|      |                                         |     | c.233+17G>T                 | -                                 | Intronic                 | No association test conducted                                                        |
|      |                                         |     | c.233+108A>G                | -                                 | Intronic                 | No association test conducted                                                        |
|      |                                         |     | c.*107G>A                   | c.*107G>A, rs852784980            | 3' UTR                   | No association test conducted                                                        |
| IL6  | Canis familiaris; various inc. mongrels | N/A | c.102T>C                    | N/A                               | Synonymous coding        | No association test conducted                                                        |
|      |                                         |     | c.572G>A                    | N/A                               | Synonymous coding        | No association test conducted                                                        |
|      |                                         |     | c.309+215T>C                | -                                 | Intronic                 | No significant association found with BCS                                            |
|      |                                         |     | c.*283G>A                   | c.*283G>A, rs850980833            | 3' UTR                   | No association test conducted                                                        |
| RETN | Canis familiaris; various inc. mongrels | N/A | c.75G>A                     | c.75G>A, p.Glu25Glu, rs852185407  | Synonymous coding        | No significant association found with BCS                                            |
|      |                                         |     | c.141C>T                    | c.141C>T, p.Gly47Gly, rs852329356 | Synonymous coding        | No association test conducted                                                        |
|      |                                         |     | Synonymous coding: c.236C>G | c.236C>G, p.Ser79Cys, rs851766760 | Non-synonymous, missense | No association test conducted                                                        |
|      |                                         |     | c.19C>T, p.Leu7Phe          | c.19C>T, p.Leu7Phe, rs852470997   | Non-synonymous, missense | No association test conducted                                                        |

|         |                                                     |           |                                       |                             |          |                                                  |                                       |
|---------|-----------------------------------------------------|-----------|---------------------------------------|-----------------------------|----------|--------------------------------------------------|---------------------------------------|
|         |                                                     |           | c.194-69T>A                           | c.194-69T>A,<br>rs853182485 | Intronic | No significant<br>association found<br>with BCS  |                                       |
|         |                                                     |           | c.115+29G>C;                          | -                           | Intronic | No association test<br>conducted                 |                                       |
|         |                                                     |           | c.115+143T>G                          | -                           | Intronic | No association test<br>conducted                 |                                       |
|         |                                                     |           | c.116-179G>A                          | -                           | Intronic | No association test<br>conducted                 |                                       |
| FAM174A | <i>Equus ferus<br/>caballus</i> ; Arabian<br>horses | EquCab2.0 | BIEC2-262534,<br>chr14:69276814 T > C | N/A                         | Intronic | Associated with<br>various metabolic<br>measures | Lewis et al.<br>2016/2017<br>[12, 13] |
|         |                                                     |           | FAM174A 11-G                          | N/A                         | 3' UTR   |                                                  |                                       |

## References

- [1] E. Raffan *et al.*, "A Deletion in the Canine POMC Gene Is Associated with Weight and Appetite in Obesity-Prone Labrador Retriever Dogs," *Cell Metab*, vol. 23, no. 5, pp. 893-900, May 10 2016, doi: 10.1016/j.cmet.2016.04.012.
- [2] A. Skorczyk *et al.*, "Polymorphism and chromosomal location of the MC4R (melanocortin-4 receptor) gene in the dog and red fox," *Gene*, vol. 392, no. 1-2, pp. 247-52, May 1 2007, doi: 10.1016/j.gene.2006.12.027.
- [3] L. van den Berg *et al.*, "Analysis of variation in the melanocortin-4 receptor gene (mc4r) in Golden Retriever dogs," *Anim Genet*, vol. 41, no. 5, p. 557, Oct 2010, doi: 10.1111/j.1365-2052.2010.02049.x.
- [4] R. Zeng, Y. Zhang, and P. Du, "SNPs of melanocortin 4 receptor (MC4R) associated with body weight in Beagle dogs," *Exp Anim*, vol. 63, no. 1, pp. 73-8, 2014, doi: 10.1538/expanim.63.73.
- [5] M. Mankowska, J. Nowacka-Woszek, A. Graczyk, P. Ciazynska, M. Stachowiak, and M. Switonski, "Polymorphism and methylation of the MC4R gene in obese and non-obese dogs," *Mol Biol Rep*, vol. 44, no. 4, pp. 333-339, Aug 2017, doi: 10.1007/s11033-017-4114-3.
- [6] Y. Forcada, A. Holder, D. B. Church, and B. Catchpole, "A polymorphism in the melanocortin 4 receptor gene (MC4R:c.92C>T) is associated with diabetes mellitus in overweight domestic shorthaired cats," *J Vet Intern Med*, vol. 28, no. 2, pp. 458-64, Mar-Apr 2014, doi: 10.1111/jvim.12275.
- [7] M. Grzes, I. Szczerbal, H. Fijak-Nowak, M. Szydlowski, and M. Switonski, "Two candidate genes (FTO and INSIG2) for fat accumulation in four canids: chromosome mapping, gene polymorphisms and association studies of body and skin weight of red foxes," *Cytogenet Genome Res*, vol. 135, no. 1, pp. 25-32, 2011, doi: 10.1159/000330457.
- [8] A. Skorczyk, K. Flisikowski, M. Szydlowski, J. Cieslak, R. Fries, and M. Switonski, "Association of MC3R gene polymorphisms with body weight in the red fox and comparative gene organization in four canids," *Anim Genet*, vol. 42, no. 1, pp. 104-7, Feb 2011, doi: 10.1111/j.1365-2052.2010.02075.x.
- [9] M. Miyabe *et al.*, "Genetic variants of the unsaturated fatty acid receptor GPR120 relating to obesity in dogs," *J Vet Med Sci*, vol. 77, no. 10, pp. 1201-6, Oct 2015, doi: 10.1292/jvms.15-0031.
- [10] N. Nishii *et al.*, "Cloning, expression and investigation for polymorphisms of canine peroxisome proliferator-activated receptors," *Comp Biochem Physiol B Biochem Mol Biol*, vol. 147, no. 4, pp. 690-7, Aug 2007, doi: 10.1016/j.cbpb.2007.04.011.

- [11] M. Mankowska *et al.*, "Sequence analysis of three canine adipokine genes revealed an association between TNF polymorphisms and obesity in Labrador dogs," *Anim Genet*, vol. 47, no. 2, pp. 245-9, Apr 2016, doi: 10.1111/age.12390.
- [12] S. Lewis, H. Holl, M. T. Long, M. Mallicote, and S. Brooks, "Candidate Gene and Marker for Equine Metabolic Syndrome," *Journal of Animal Science*, vol. 94, 5, pp. 166-167, 2016.
- [13] S. L. Lewis *et al.*, "Genomewide association study reveals a risk locus for equine metabolic syndrome in the Arabian horse," *J Anim Sci*, vol. 95, no. 3, pp. 1071-1079, Mar 2017, doi: 10.2527/jas.2016.1221.
